# Supplementary material for: Phylogenesis and Biological Characterization of a New Glucose Transporter in the Chicken (Gallus gallus), GLUT12
Source: PubMed Central journal article supplement (PMC4592010; doi:10.1371/journal.pone.0139517), 2015-10-02

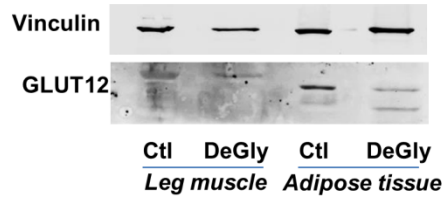

Supplement: pone.0139517.s001.pdf [file pone.0139517.s001.pdf]
